# Supplementary material for: Inhibition of glucose-6-phosphate dehydrogenase sensitizes cisplatin-resistant cells to death
Source: PubMed Central journal article supplement (PMC4745784; doi:10.18632/oncotarget.4945), 2015-08-17
Supplement: oncotarget-06-30102-s001.pdf [file oncotarget-06-30102-s001.pdf]

## SUPPLEMENTARY MATERIALS AND METHODS

### CELL LINES

#### Human cervix squamous cell lines

(A431 wild type and A431pt cisplatin resistant cells) were grown in Roswell Park Memorial Institute medium (RPMI 1640) supplemented with 10% fetal bovine serum (FBS), 4 mM glutamine, 100 U/ml penicillin and 100 µg/ml streptomycin, in humidified condition at 5% CO<sub>2</sub> and 37°C. All reagents for cell culture were from Cambrex-Lonza (NY, USA) and FBS from Gibco, Invitrogen (Carlsbad, CA, USA).

### CELL VIABILITY ASSAYS

#### Trypan blue exclusion assay

$1.5 \times 10^5$  cells (2008-C13) or  $7.5 \times 10^4$  cells (A431-A431pt) were plated on 12-well plates and, following overnight incubation, were exposed to different treatments according to experimental protocols. After treatments, cells were washed, detached with 0.25% trypsin-0.2% EDTA and suspended in trypan blue (Sigma-Aldrich, St Louis, MO, USA) at 1:1 ratio in medium solution. Cells were counted using a chamber Burker hemocytometer.

#### Sulforhodamine B (SRB) test

$2.5 \times 10^3$  cells were plated on 96-well plates and, following overnight incubation, were exposed to different treatments according to experimental protocols. After treatments cells were fixed to tissue-culture plates with trichloroacetic acid (Sigma-Aldrich) and stained for 30 minutes with SRB (Sigma-Aldrich). The bound SRB was dissolved by adding 160 µl of 10 mM TRIS (pH = 10.5) and the absorbance was measured at 570 nm using a Victor3X multilabel plate counter (Wallac Instruments).

### GLUCOSE UPTAKE

$5 \times 10^3$  cells (A431-A431pt) were plated in 96-well plate and allowed to attach overnight. After 24 hours, glucose uptake was measured by incubating cells with 90 µM glucose analogue 6-NBDG (Invitrogen, Paisley, UK) for 10 minute. Cells were then washed, added with PBS and their fluorescence ( $\lambda_{ex}$ : 465 nm,  $\lambda_{em}$ : 540nm) was measured by Victor3X multilabel plate counter (Wallac Instruments).

### IMMUNOBLOT ASSAY

$1 \times 10^6$  cells (A431-A431pt) were plated in 100 mm cell culture dish and allowed to attach overnight. After 48 hours, cells were lysed with ice-cold lysis buffer supplemented with the protease inhibitor cocktails (Roche Molecular Biochemicals). The protein content was determined by Lowry procedure (Bio-rad DC Protein Assay). Equal amounts of protein (40 µg) were loaded on a polyacrylamide gel and electrophoretically separated in running buffer. After electrophoresis, the proteins were blotted onto an Hybond-P PVDF membrane (Amersham Biosciences). After blocking, the membrane was exposed to the elected primary antibodies: anti-GLUT1 (1:1000; Abcam) or anti-G6PD (1:500; Santa Cruz Biotechnology, Inc.). After washing, the membrane was incubated with HRP-conjugated anti-rabbit secondary antibody (1:3500; PerkinElmer). The signal was visualized with enhanced chemoluminescent kit (Amersham Biosciences) according to the manufacturer's instructions and analyzed by Molecular Imager VersaDoc MP 4000 (Bio-rad). GLUT1 and G6PD were normalized to GAPDH (1:2000; Santa Cruz Biotechnology, Inc.).

### QUANTITATIVE REAL-TIME PCR

To measure the mRNA level of G6PD, total mRNA was isolated with TRIzol (Life Technologies) as previously described by Chomczynski P and Sacchi N [42] and measured with a Beckman Coulter DU-800 spectrophotometer. The relative expression of each gene was determine by quantitative real-time PCR (Eco™ Illumina, Real-Time PCR system) using One Step SYBR PrimeScript RT-PCR Kit (Takara Bio, Inc.) and the primers designed as follow: G6PDH: F aagaacgtgaagctcctga R aatataggggatggcttgg. Linearity and efficiency of PCR amplifications were assessed using standard curves generated by serial dilution of complementary DNA; melt-curve analysis was used to confirm the specificity of amplification and absence of primer dimers. G6PD was normalized to GAPDH designed as follow: F ctgacttcaacagcgacacc R gtgggtccaggggtcttactc. Expression levels of the indicated genes were calculated by the  $\Delta\Delta C_t$  method using respectively the dedicated StepOne software or Eco™ Software v4.0.7.0.

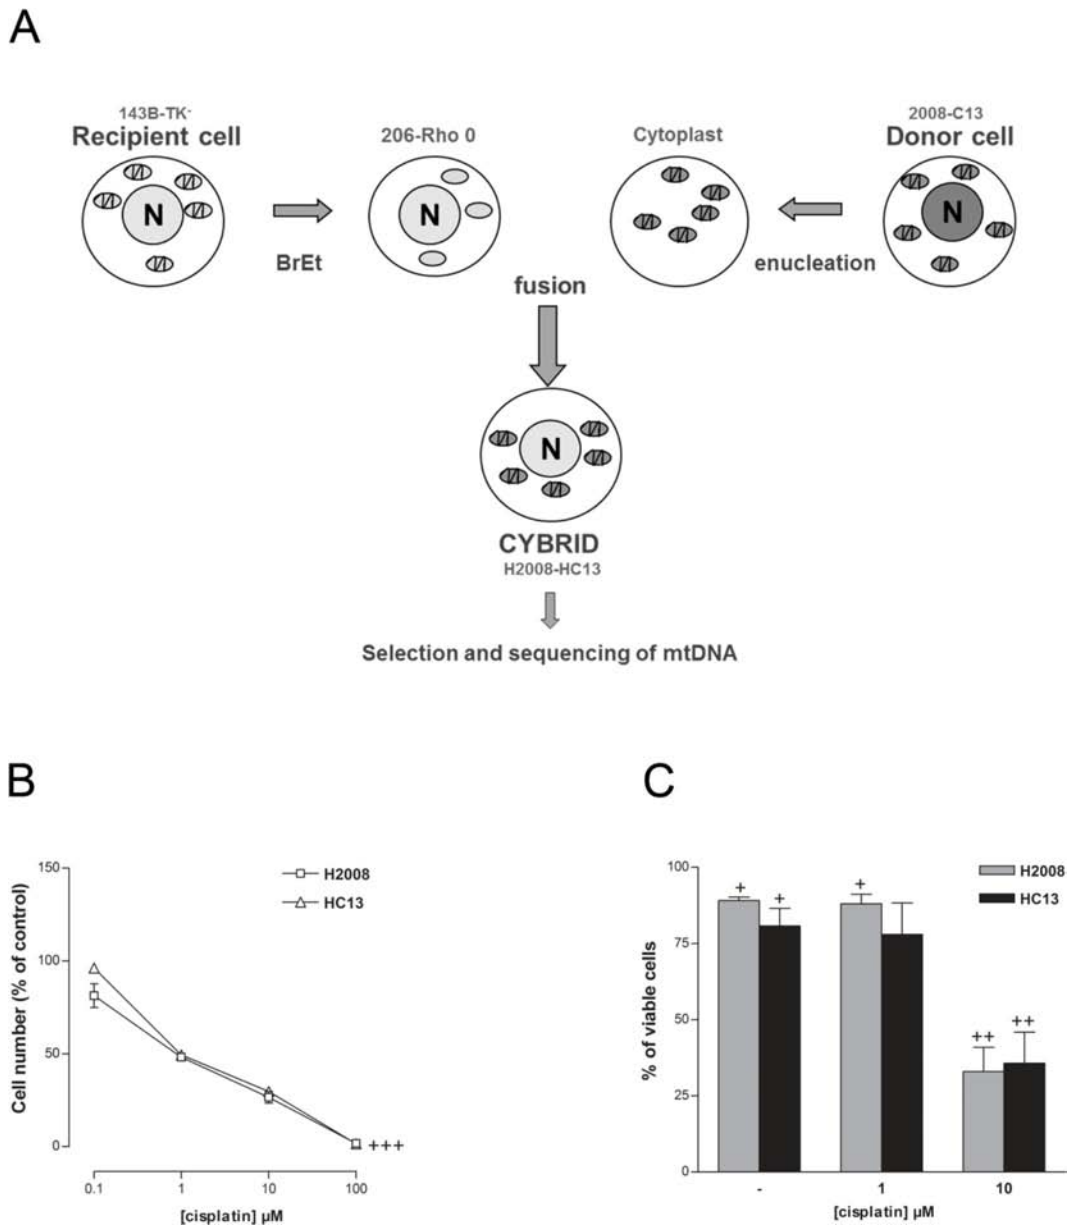

**Supplementary Figure S1: Transmitochondrial hybrid cell model.** A. Schematic representation of cybrids (H2008-HC13) generation. B-C. Effect of cisplatin on cybrid cell viability measured by trypan blue exclusion assay (B) and by flow cytometry (C) The data were obtained from at least three independent cultures. +++ $p < 0.001$ , ++ $p < 0.01$ , + $p < 0.05$ ; treatment vs control.

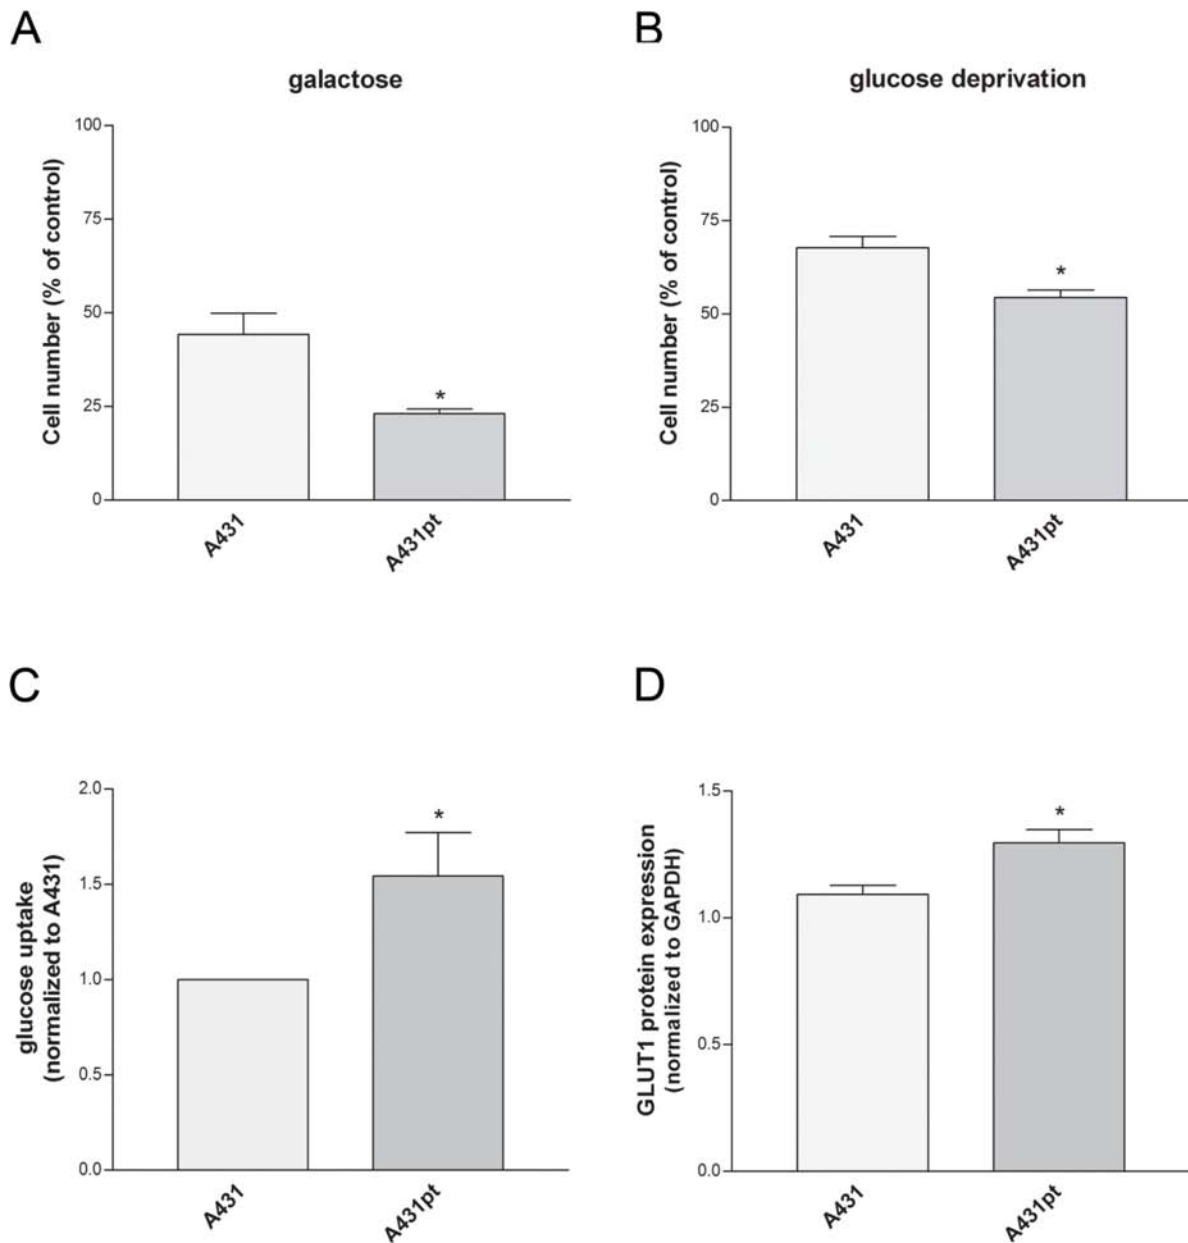

**Supplementary Figure S2: Cisplatin-resistant cells show an increased dependency to glucose.** **A.** Effect of 5 mM galactose and **B.** glucose deprivation on cell viability after 24 hours of treatment in A431 and A431pt cell lines. Data are expressed as percentage of cell number compared to the relative control. **C.** Glucose uptake measured after incubation with the glucose analogue 6-NBDG. Data are normalized to cisplatin-sensitive cells. **D.** Protein expression GLUT1 measured by western blotting. GLUT1 was normalized to GAPDH. The data were obtained from at least 3–4 independent cultures. \* $p < 0.05$ ; A431pt vs A431.

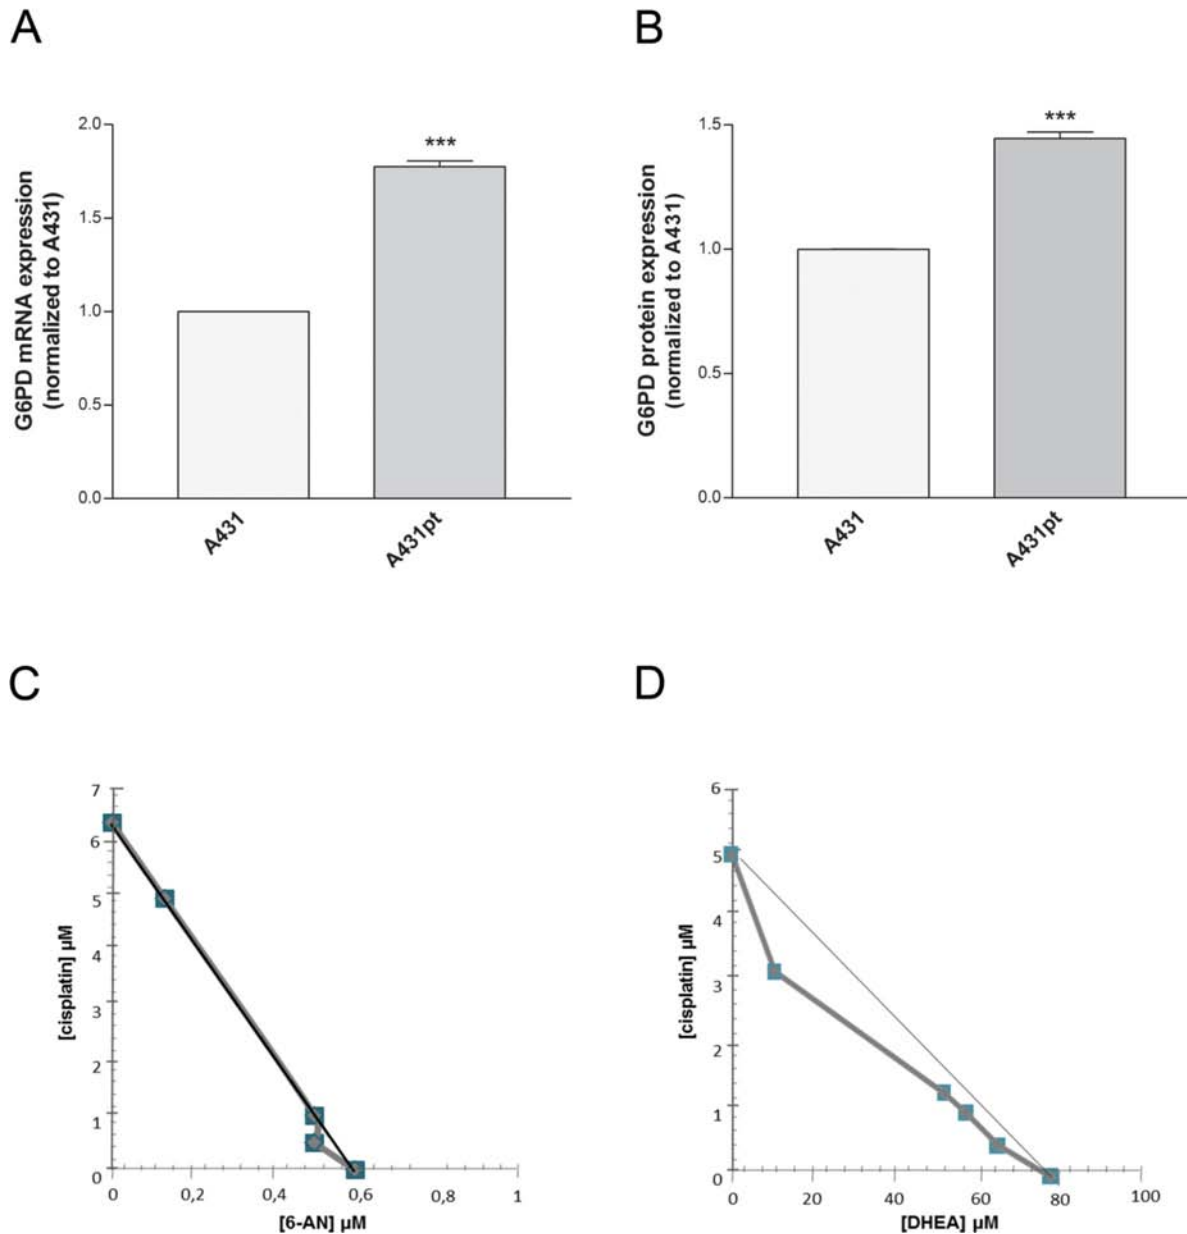

**Supplementary Figure S3: Inhibition of G6PD, sensitizes cisplatin-resistant cells.** A–B. mRNA levels and protein expression of G6PD. Data are expressed as ratio of cisplatin-resistant cell line (A431pt) on the sensitive counterpart (A431). C–D. Isobologram showing the effect of 6AN or DHEA administered in association with cisplatin treatment on cisplatin-resistant A431pt cells. Data are expressed as percentage of cell number compared to control. The graph was obtained using iso-effective drug concentrations causing 25% of cytotoxic effect. Straight line indicates the theoretical additivity line. The data were obtained from at least 3–5 independent cultures. \*\*\* $p < 0.001$ ; A431 vs A431pt.

A

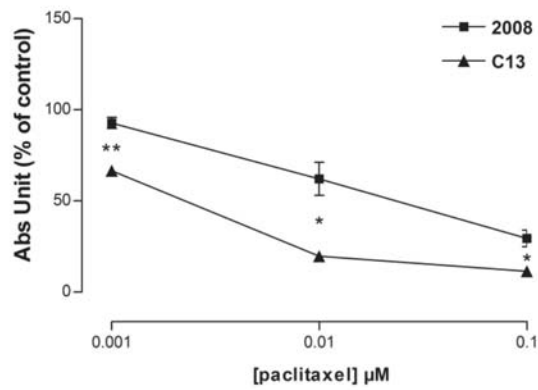

B

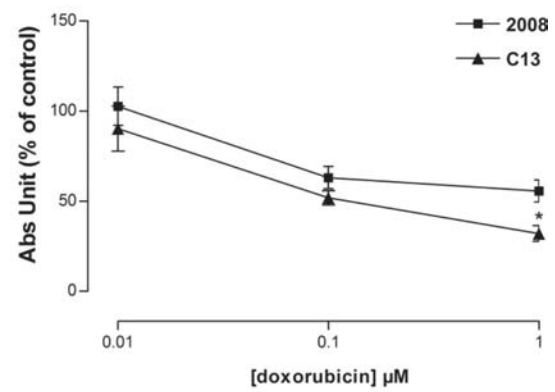

C

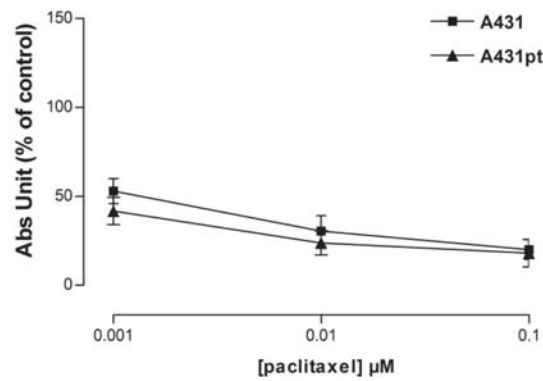

D

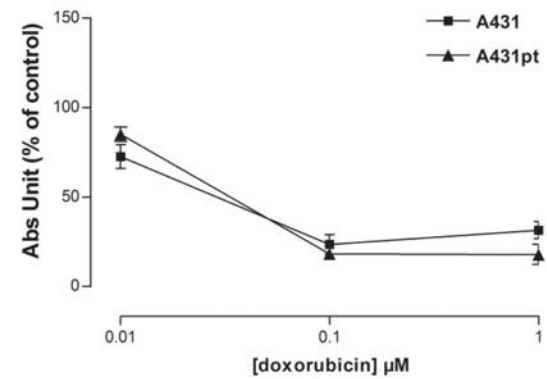

**Supplementary Figure S4: Cisplatin-resistant cells do not display cross-resistance.** Effect of paclitaxel (0.001–0.1  $\mu\text{M}$ ) and doxorubicin (0.01–1  $\mu\text{M}$ ) on cell viability after 24 hours of treatment. Data are expressed as percentage of cell number compared to the relative control. The data were obtained from at least 3–4 independent cultures.  $**p < 0.01$ ,  $*p < 0.05$ ; C13 vs 2008.

**Supplementary Table S1: GSH vs GSSG ratio**

|             | <b>GSH</b>   | <b>GSSG</b> | <b>GSH/GSSG</b>      |
|-------------|--------------|-------------|----------------------|
| <b>2008</b> | 28,07 ± 3,76 | 0,34 ± 0,09 | <b>85,54 ± 15,11</b> |
| <b>C13</b>  | 63,20 ± 6,83 | 0,67 ± 0,13 | <b>96,73 ± 17,4</b>  |
